# Supplementary material
Source: MDPI journal article supplement (https://www.mdpi.com/2504-5377/7/1/8)
Supplement: s1 [file s1]

## Supplementary Material

### Gd(OH)<sub>3</sub> as modifier of iron oxide nanoparticles intended as dual RMI contrast agents: Insights on the synthesis, characterization and stability

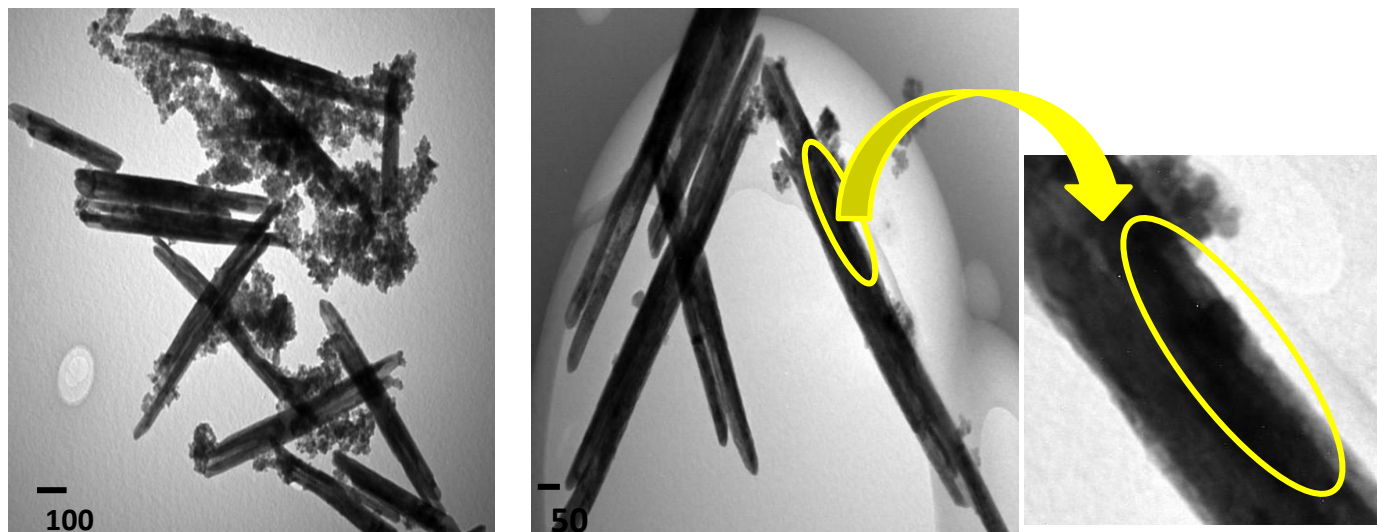

**Figure S1.** TEM images of Mag@Gd(OH)<sub>3</sub>@Man.

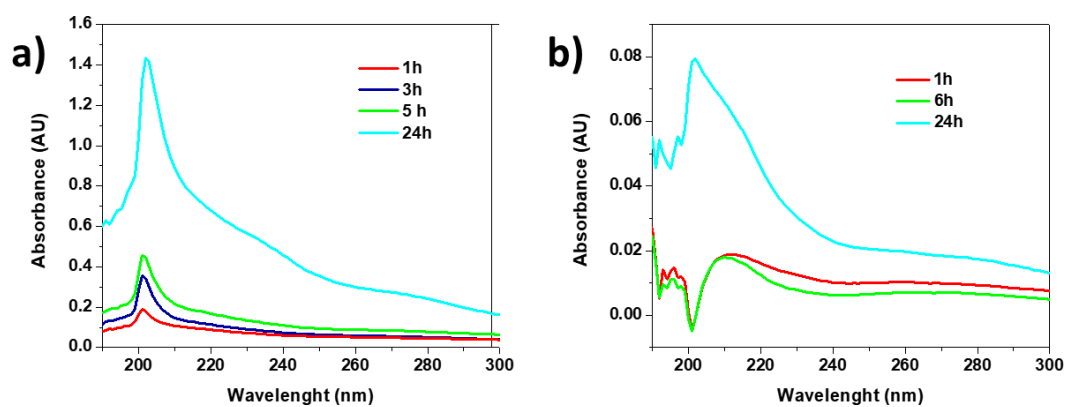

**Figure S2.** UV-Vis spectras of the PBS supernatant of the stability assays of a)Mag@Gd(OH)<sub>3</sub> and b) Mag@Gd(OH)<sub>3</sub>@Man.

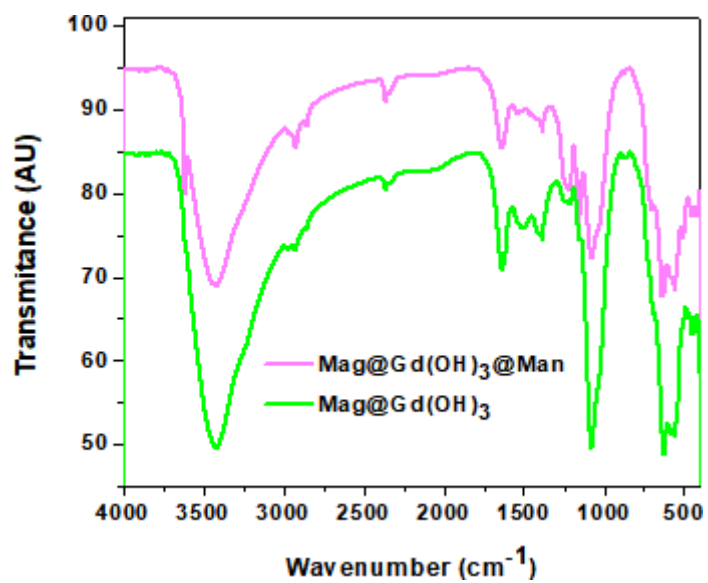

**Figure S3.** FTIR of Mag@Gd(OH)<sub>3</sub> and Mag@Gd(OH)<sub>3</sub>@Man after 24 h of stability assay. It is appreciated the lack of gadolinium hydroxide bands in the uncoated nanoparticles.
